# Supplementary material for: Development of a Targeted NGS Assay for the Detection of Respiratory Pathogens including SARS-CoV-2 in Felines
Source: MDPI journal article supplement (doi:10.3390/pathogens13040335), 2024-04-17
Supplement: s1 [file Supplementary tables S1, S2, S3.pdf › Supplementary tables S1, S2, S3.pdf]

Table S1. Diagnostic Sensitivity and Specificity Testing- comparison between qPCR and tNGS assay for detection of feline respiratory pathogens from 31 clinical samples.

| ACCESSION | SPECIMEN          | qPCR Results                |       |                                                                            | tNGS results                                                                                                                |
|-----------|-------------------|-----------------------------|-------|----------------------------------------------------------------------------|-----------------------------------------------------------------------------------------------------------------------------|
| A13-4105  | lung              | FeHV-1 Ct                   | 16.43 | Other pathogens not tested                                                 | Results matched qPCR results                                                                                                |
| A14-7200  | lung              | FeHV-1 Ct                   | 20.88 | Other pathogens not tested                                                 | Results matched qPCR results                                                                                                |
| S12-1183  | lung              | FCV Ct                      | 19.76 | Other pathogens not tested                                                 | Results matched qPCR results                                                                                                |
| A18-14725 | lung              | FCV Ct                      | 16.28 | Other pathogens not tested                                                 | Results matched qPCR results                                                                                                |
| A19-8904  | Nasal swab        | FeHV-1 Ct                   | 15.66 | Other pathogens not tested                                                 | Results matched qPCR results                                                                                                |
| A12-603   | lung              | FeHV-1 Ct                   | 17.36 | Other pathogens not tested                                                 | Results matched qPCR results                                                                                                |
| A23-11429 | Nasal Swab        | <i>Mycoplasma</i> spp. Ct   | 28.33 | Negative for <i>B. bronchiseptica</i> spp., FeHV-1                         | <b>Negative for <i>B. bronchiseptica</i>, <i>Chlamydia felis</i>, FeHV-1, Positive for <i>Mycoplasma felis</i>, FCV</b>     |
|           |                   | <i>B. bronchiseptica</i> Ct | 33.21 |                                                                            |                                                                                                                             |
|           |                   | FCV Ct                      | 27.54 |                                                                            |                                                                                                                             |
| A23-13268 | OP Swab           | <i>Mycoplasma</i> spp. Ct   | 35.38 | Negative for <i>B. bronchiseptica</i> , <i>Chlamydia</i> spp., FCV, FeHV-1 | Results matched qPCR results                                                                                                |
| A24-11806 | Lung              | <i>Mycoplasma</i> spp. Ct   | 20.02 | Negative for <i>Chlamydia</i> spp., FCV, FeHV-1                            | Results matched qPCR results                                                                                                |
|           |                   | <i>B. bronchiseptica</i> Ct | 29.62 |                                                                            |                                                                                                                             |
| A24-14404 | Endotracheal Wash | <i>Mycoplasma</i> spp. Ct   | 33.17 | Other pathogens not tested                                                 | Result matched qPCR result                                                                                                  |
| A24-14405 | Nasal Swab        | <i>Mycoplasma</i> spp. Ct   | 20.33 | Negative for <i>B. bronchiseptica</i> , <i>Chlamydia</i> spp., FCV, FeHV-1 | Results matched qPCR results                                                                                                |
| A24-5450  | Lung              | <i>Mycoplasma</i> spp. Ct   | 31.42 | Negative for <i>B. bronchiseptica</i>                                      | <b>Negative for <i>Chlamydia felis</i>, <i>B. bronchiseptica</i>, Positive for <i>Mycoplasma felis</i>, FCV, and FeHV-1</b> |
|           |                   | <i>Chlamydia</i> spp. Ct    | 31.33 |                                                                            |                                                                                                                             |
|           |                   | FCV Ct                      | 35.58 |                                                                            |                                                                                                                             |
|           |                   | FeHV-1 Ct                   | 29.29 |                                                                            |                                                                                                                             |
| A24-5450  | Nasal Swab        | <i>Mycoplasma</i> spp. Ct   | 20.54 | Negative for <i>B. bronchiseptica</i>                                      | Results matched qPCR results                                                                                                |
|           |                   | <i>Chlamydia</i> spp. Ct    | 23.44 |                                                                            |                                                                                                                             |
|           |                   | FCV Ct                      | 29.27 |                                                                            |                                                                                                                             |
|           |                   | FeHV-1 Ct                   | 14.91 |                                                                            |                                                                                                                             |

|           |                             |                             |       |                                                                                                    |                                                                                                                          |
|-----------|-----------------------------|-----------------------------|-------|----------------------------------------------------------------------------------------------------|--------------------------------------------------------------------------------------------------------------------------|
| A24-6974  | Ocular, OP, and Nasal Swabs | <i>Mycoplasma</i> spp. Ct   | 23.56 | Negative for <i>Chlamydia</i> spp.                                                                 | Results matched qPCR results                                                                                             |
|           |                             | <i>B. bronchiseptica</i> Ct | 26.78 |                                                                                                    |                                                                                                                          |
|           |                             | FCV Ct                      | 25.44 |                                                                                                    |                                                                                                                          |
|           |                             | FeHV-1 Ct                   | 35.00 |                                                                                                    |                                                                                                                          |
| A24-6974  | OP and Ocular Swabs         |                             | *     | Negative for <i>B. bronchiseptica</i> , <i>Chlamydia</i> spp., FCV, FeHV-1, <i>Mycoplasma</i> spp. | Results matched qPCR results                                                                                             |
| A24-7717  | OP Swab                     | <i>Mycoplasma</i> spp. Ct   | 22.76 | Negative for <i>B. bronchiseptica</i> , FeHV-1                                                     | <b>Positive for <i>B. bronchiseptica</i>, <i>Mycoplasma felis</i>, FCV, Negative for <i>Chlamydia felis</i>, FeHV-1</b>  |
|           |                             | <i>Chlamydia</i> spp. Ct    | 30.42 |                                                                                                    |                                                                                                                          |
|           |                             | FCV Ct                      | 30.26 |                                                                                                    |                                                                                                                          |
| A24-8065  | Endotracheal Wash           | <i>Mycoplasma</i> spp. Ct   | 24.89 | Other pathogens not tested                                                                         | Results matched qPCR result                                                                                              |
| A24-8396  | OP Swab                     | <i>Mycoplasma</i> spp. Ct   | 23.19 | Negative for <i>B. bronchiseptica</i> , FCV, FeHV-1                                                | Positive for <i>Mycoplasma felis</i> , <b>Negative for <i>Chlamydia felis</i>, <i>B. bronchiseptica</i>, FCV, FeHV-1</b> |
|           |                             | <i>Chlamydia</i> spp. Ct    | 27.69 |                                                                                                    |                                                                                                                          |
| A23-13578 | OP Swab                     | <i>B. bronchiseptica</i> Ct | 34.16 | Negative for <i>Mycoplasma</i> spp., <i>Chlamydia</i> spp., FCV, FeHV-1                            | Results matched qPCR results                                                                                             |
| A24-10580 | Nasal Swab                  | <i>B. bronchiseptica</i> Ct | 33.05 | Negative for <i>Mycoplasma</i> spp.                                                                | Results matched qPCR results                                                                                             |
|           |                             | <i>Chlamydia</i> spp. Ct    | 31.64 |                                                                                                    |                                                                                                                          |
|           |                             | FCV Ct                      | 22.20 |                                                                                                    |                                                                                                                          |
|           |                             | FeHV-1 Ct                   | 16.02 |                                                                                                    |                                                                                                                          |
| A24-5813  | Lung pool                   | <i>B. bronchiseptica</i> Ct | 32.02 | Negative for <i>Chlamydia</i> spp., FeHV-1                                                         | Results matched qPCR results                                                                                             |
|           |                             | <i>Mycoplasma</i> spp. Ct   | 20.23 |                                                                                                    |                                                                                                                          |
|           |                             | FCV Ct                      | 19.08 |                                                                                                    |                                                                                                                          |
| A24-8280  | OP Swab                     | <i>B. bronchiseptica</i> Ct | 35.00 | Negative for <i>Chlamydia</i> spp., FCV, FeHV-1, <i>Mycoplasma</i> spp.                            | <b>Negative for <i>B. bronchiseptica</i>, <i>Chlamydia</i> spp., FCV, FeHV-1, Positive for <i>Mycoplasma felis</i></b>   |
| A23-17385 | OP Swab                     |                             | *     | Negative for <i>B. bronchiseptica</i> ,                                                            | Results matched qPCR results                                                                                             |

|          |                              |                           |                      |                                                                                                    |                                                                                                                                         |
|----------|------------------------------|---------------------------|----------------------|----------------------------------------------------------------------------------------------------|-----------------------------------------------------------------------------------------------------------------------------------------|
|          |                              |                           |                      | <i>Chlamydia</i> spp., FCV, FeHV-1, <i>Mycoplasma</i> spp.                                         |                                                                                                                                         |
| A24-2384 | Bronchoalveolar Lavage (BAL) |                           | *                    | Negative for <i>Mycoplasma</i> spp.                                                                | Results matched qPCR results                                                                                                            |
| A24-5509 | Lung                         | FeHV-1 Ct                 | 36.40                | Negative for <i>B. bronchiseptica</i> , <i>Chlamydia</i> spp., FCV, <i>Mycoplasma</i> spp.         | Results matched qPCR results                                                                                                            |
| A24-5650 | OP Swab                      | <i>Chlamydia</i> spp. Ct  | 31.97                | Negative for <i>B. bronchiseptica</i> and <i>Mycoplasma</i> spp.                                   | <b>Negative for <i>Chlamydia felis</i>, FCV,</b> positive for FeHV-1, negative for <i>B. bronchiseptica</i> and <i>Mycoplasma felis</i> |
|          |                              | FCV Ct                    | 25.57                |                                                                                                    |                                                                                                                                         |
|          |                              | FeHV-1 Ct                 | 22.16                |                                                                                                    |                                                                                                                                         |
| A24-6304 | OP Swab                      |                           | *                    | Negative for <i>B. bronchiseptica</i> , <i>Chlamydia</i> spp., FCV, FeHV-1, <i>Mycoplasma</i> spp. | Results matched qPCR results                                                                                                            |
| A24-6455 | Lung                         |                           | *                    | Negative for <i>B. bronchiseptica</i> , <i>Chlamydia</i> spp., FCV, FeHV-1, <i>Mycoplasma</i> spp. | <b>Positive for <i>Mycoplasma felis</i>,</b> Negative for <i>B. bronchiseptica</i> , <i>Chlamydia</i> spp., FCV, FeHV-1                 |
| A24-7609 | Nasal Swab                   |                           | *                    | Negative for <i>B. bronchiseptica</i> , <i>Chlamydia</i> spp., FCV, FeHV-1, <i>Mycoplasma</i> spp. | Results matched qPCR results                                                                                                            |
| Cheerio  | Ocular swab                  | <i>Chlamydia</i> spp. Ct  | 36.9                 | Other pathogens not tested                                                                         | Results matched qPCR                                                                                                                    |
| Atticus  | Ocular Swab                  | <i>Mycoplasma</i> spp. Ct | Positive, Ct unknown | Negative for FCV, FeHV-1                                                                           | Results matched qPCR                                                                                                                    |

Table S2. Comparison of MagMAX Viral/Pathogen Nucleic Acid Isolation Kit and MagMAX CORE Nucleic Acid Purification Kit with silica bead beating

| Sample 1                 | Viral/Pathogen Kit (avg number reads) | CORE (avg number reads) |
|--------------------------|---------------------------------------|-------------------------|
| SARS-CoV-2               | <b>3498</b>                           | <b>158</b>              |
| FeHV-1                   | 152626                                | 61152                   |
| FCV                      | 1054                                  | 93                      |
| <i>C. felis</i>          | 259766                                | 113676                  |
| <i>B. bronchiseptica</i> | 141793                                | 67118                   |
| Sample 2                 |                                       |                         |
| SARS-CoV-2               | <b>688</b>                            | <b>261</b>              |
| FeHV-1                   | 55911                                 | 63182                   |

|                          |             |            |
|--------------------------|-------------|------------|
| FCV                      | 222         | 94         |
| <i>C. felis</i>          | 86056       | 112225     |
| <i>B. bronchiseptica</i> | 46264       | 77783      |
| <b>Sample 3</b>          |             |            |
| SARS-CoV-2               | <b>655</b>  | <b>211</b> |
| FeHV-1                   | 56761       | 56829      |
| FCV                      | 171         | 53         |
| <i>C. felis</i>          | 79931       | 102064     |
| <i>B. bronchiseptica</i> | 46319       | 70982      |
| <b>Sample 4</b>          |             |            |
| SARS-CoV-2               | <b>1404</b> | <b>238</b> |
| FeHV-1                   | 118188      | 55572      |
| FCV                      | 404         | 35         |
| <i>C. felis</i>          | 162247      | 72399      |
| <i>B. bronchiseptica</i> | 46264       | 78088      |

Table S3. Comparison of MagMAX Viral/Pathogen Nucleic Acid Isolation Kit vs MagMAX Pathogen RNA/DNA Kit for extraction of SARS-CoV-2 from feline positive and negative clinical samples.

| Sample- Ct value by qPCR                          | Viral/Pathogen Kit (avg number reads) | Pathogen RNA/DNA Kit (avg number reads) |
|---------------------------------------------------|---------------------------------------|-----------------------------------------|
| 1- 35.95, 38.49 (considered inconclusive by qPCR) | 30                                    | 0                                       |
| 2- 31.08, 30.23                                   | 4123                                  | 3650                                    |
| 3- 33.04, 36.49                                   | 59                                    | 243                                     |
| 4- No detection                                   | 0                                     | 0                                       |
| 5- 32.02, 31.75                                   | 757                                   | 483                                     |
| 6- No detection                                   | 0                                     | 0                                       |
